# Supplementary material
Source: Springer Nature journal article supplement (https://www.springermedizin.de/resource/supplementary/12979_2014_192_MOESM2_ESM.pdf/9603146)

CD4

CD8

No antigen

SEB

No antigen

SEB

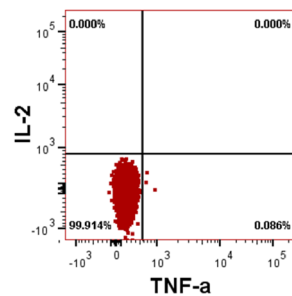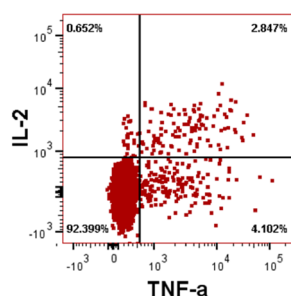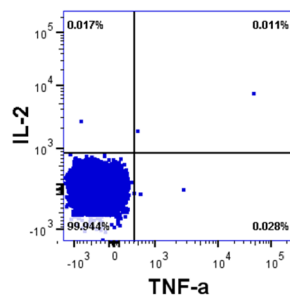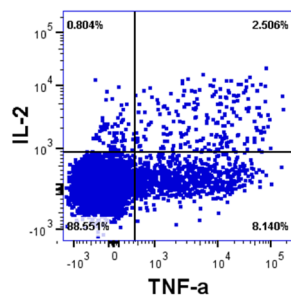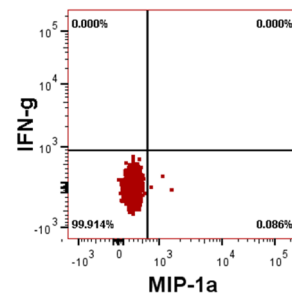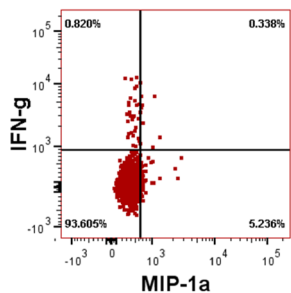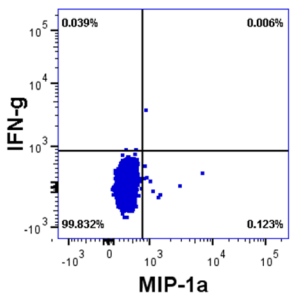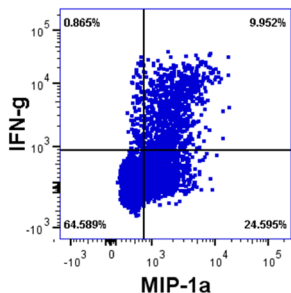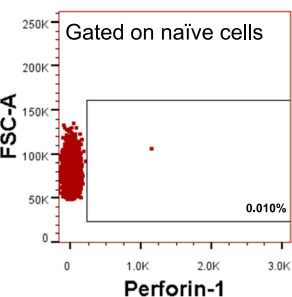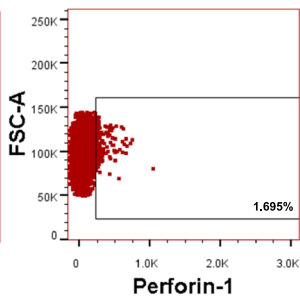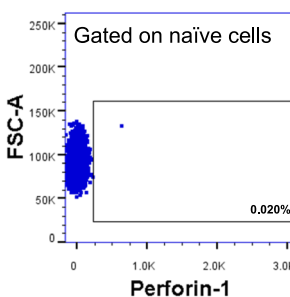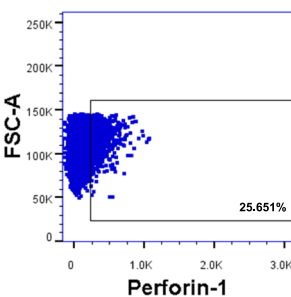

Supplement: MOESM2 [file 9603146]
